# Supplementary material for: A study of aerosol entrapment and the influence of wind speed, chamber design and foam density on polyurethane foam passive air samplers used for persistent organic pollutants
Source: Royal Society of Chemistry journal article supplement (doi:10.1039/b823016a), 2009-01-01
Supplement: b823016a.pdf [file b823016a.pdf]

## Supplementary Information

---





a)

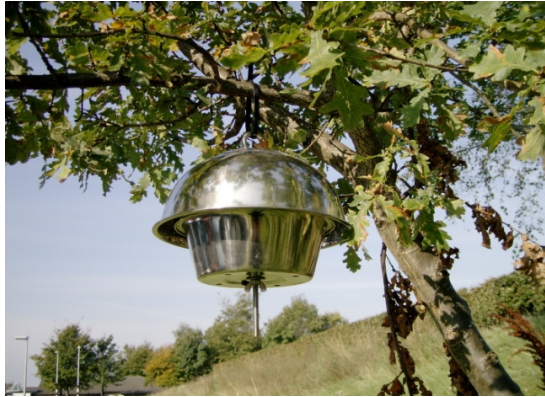

b)

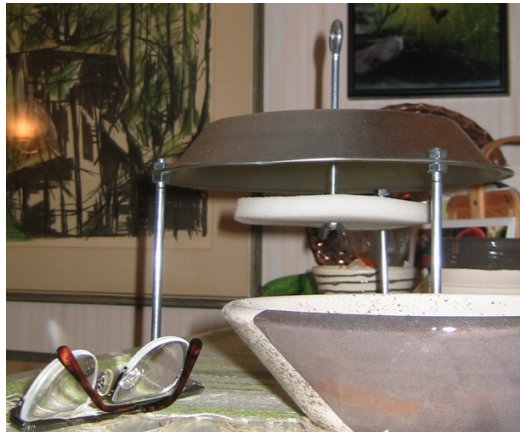

**Figure S1** Examples of PUF-based passive air samplers deployed in outdoor and indoor environments.
